# Supplementary material for: Analysis of Metabolic Markers in Patients with Chronic Heart Failure before and after LVAD Implantation
Source: MDPI journal article supplement (doi:10.3390/metabo11090615), 2021-09-09
Supplement: s1 [file s1]

## Supplementary Materials

**Table 1.** Correlations overview between metabolites and CRP at all 3 time points.

| Time point  | Metabolite class | CRP (pre- LVAD) | Time point         | Metabolite class | CRP (30 days post- LVAD) | Time point          | Metabolite class | CRP (100 days post- LVAD) |
|-------------|------------------|-----------------|--------------------|------------------|--------------------------|---------------------|------------------|---------------------------|
| (pre- LVAD) | AC               | 1               | 30 days post- LVAD | AC               | 4                        | 100 days post- LVAD | AC               | 0                         |
|             | AA               | 1               |                    | AA               | 1                        |                     | AA               | 1                         |
|             | BA               | 1               |                    | BA               | 2                        |                     | BA               | 0                         |
|             | PC               | 12              |                    | PC               | 21                       |                     | PC               | 1                         |
|             | SM               | 0               |                    | SM               | 6                        |                     | SM               | 2                         |

Correlated were the metabolites of the individual metabolite class with the respective CRP value. Two- tailed significance was calculated for pre-LVAD. One- tailed significance was calculated for 30days post-LVAD and >100days post-LVAD. AC= Acylcarnitine, AA=Aminoacids, BA= Biogenic amines, PC= Phosphatidylcholines, SM=Sphingomyelins.

**Table 2.** Correlations overview between metabolites and B at all 3 time points.

| Time point  | Metabolite class | CRP (pre- LVAD) | Time point         | Metabolite class | CRP (30 days post- LVAD) | Time point          | Metabolite class | CRP (100 days post- LVAD) |
|-------------|------------------|-----------------|--------------------|------------------|--------------------------|---------------------|------------------|---------------------------|
| (pre- LVAD) | AC               | 9               | 30 days post- LVAD | AC               | 8                        | 100 days post- LVAD | AC               | 0                         |
|             | AA               | 0               |                    | AA               | 0                        |                     | AA               | 0                         |
|             | BA               | 0               |                    | BA               | 2                        |                     | BA               | 0                         |
|             | PC               | 9               |                    | PC               | 6                        |                     | PC               | 20                        |
|             | SM               | 0               |                    | SM               | 0                        |                     | SM               | 1                         |

Correlated were the metabolites of the individual metabolite class with the respective BNP value. Two- tailed significance was calculated for pre-LVAD. One- tailed significance was calculated for 30days post-LVAD and >100days post-LVAD. AC= Acylcarnitine, AA=Aminoacids, BA= Biogenic amines, PC= Phosphatidylcholines, SM=Sphingomyelins.

**Table 3.** Detailed correlations and significances.

| Time point | Metabolite class | Metabolite     | Laboratory parameter | Spearman's $\rho$ | Significance $p$ |
|------------|------------------|----------------|----------------------|-------------------|------------------|
| pre-LVAD   | AC               | C5-OH_C3-DC-M  | CRP                  | 0.502             | 0.001            |
|            |                  | Gln            |                      | -0.345            | 0.032            |
|            |                  | Kynurenine     |                      | 0.473             | 0.002            |
|            |                  | lysoPC_a_C17_0 |                      | -0.350            | 0.029            |
|            |                  | PC_aa_C32_2    |                      | -0.335            | 0.037            |
|            |                  | PC_aa_C34_4    |                      | -0.341            | 0.034            |
|            |                  | PC_aa_C36_3    |                      | -0.405            | 0.011            |
|            |                  | PC_aa_C36_5    |                      | -0.318            | 0.049            |
|            |                  | PC_aa_C38_5    |                      | -0.349            | 0.03             |
|            |                  | PC_ae_C34_2    |                      | -0.422            | 0.007            |
|            |                  | PC_ae_C34_3    |                      | -0.382            | 0.016            |
|            |                  | PC_ae_C36_2    |                      | -0.365            | 0.022            |
|            |                  | PC_ae_C36_3    |                      | -0.386            | 0.015            |
|            |                  | PC_ae_C38_0    |                      | -0.323            | 0.045            |
|            |                  | PC_ae_C40_1    |                      | -0.341            | 0.034            |
|            | SM               |                |                      | no correlations   |                  |
|            | AC               | C12_DC         |                      | 0.372             | 0.02             |
|            |                  | C12_1          |                      | 0.423             | 0.007            |
|            |                  | C14_1          |                      | 0.377             | 0.018            |
|            |                  | C14_2          |                      | 0.417             | 0.008            |

|                  |    |                |                 |        |
|------------------|----|----------------|-----------------|--------|
| pre-LVAD         |    | C18_1_OH       | 0.326           | 0.043  |
|                  |    | C3_DC_C4_OH    | 0.390           | 0.014  |
|                  |    | C5_M_DC        | 0.395           | 0.013  |
|                  |    | C5_OH_C3_DCM   | 0.357           | 0.026  |
|                  |    | C6_C4_1_DC     | 0.555           | <0.001 |
|                  | AA |                | no correlations |        |
|                  | BA |                | no correlations |        |
|                  | PC | lysoPC_a_C18_2 | -0.369          | 0.021  |
|                  |    | PC_aa_C32_2    | -0.348          | 0.03   |
|                  |    | PC_aa_C34_3    | -0.327          | 0.042  |
|                  |    | PC_aa_C34_4    | -0.404          | 0.011  |
|                  |    | PC_aa_C36_3    | -0.374          | 0.019  |
|                  |    | PC_aa_C36_6    | -0.407          | 0.01   |
|                  |    | PC_ae_C36_2    | -0.317          | 0.05   |
|                  |    | PC_ae_C38_0    | -0.385          | 0.015  |
|                  |    | PC_ae_C40_1    | -0.383          | 0.016  |
|                  |    |                |                 |        |
| 30days post-LVAD | AC | C12_1          | 0.306           | 0.027  |
|                  |    | C2             | 0.286           | 0.037  |
|                  |    | C3_DC_C4_OH    | 0.280           | 0.04   |
|                  |    | C5_M_DC        | 0.286           | 0.037  |
|                  |    |                |                 |        |
|                  | AA | His            | 0.270           | 0.046  |
|                  | BA | Kynurenine     | 0.347           | 0.014  |
|                  |    | Total_DMA      | 0.405           | 0.005  |
|                  | PC | lysoPC_a_C17_0 | -0.565          | <0.001 |
|                  |    | lysoPC_a_C18_2 | -0.532          | <0.001 |
|                  |    | PC_aa_C28_1    | -0.374          | 0.009  |
|                  |    | PC_aa_C30_0    | -0.306          | 0.027  |
|                  |    | PC_aa_C32_2    | -0.283          | 0.038  |
|                  |    | PC_aa_C32_3    | -0.298          | 0.031  |
|                  |    | PC_aa_C34_3    | -0.439          | 0.002  |
|                  |    | PC_aa_C34_4    | -0.601          | <0.001 |
|                  |    | PC_aa_C36_0    | -0.430          | 0.003  |
|                  |    | PC_aa_C36_2    | -0.331          | 0.019  |
|                  |    | PC_aa_C36_3    | -0.472          | 0.001  |
|                  |    | PC_aa_C36_5    | -0.418          | 0.004  |
|                  |    |                |                 |        |
| 30days post-LVAD | PC | PC_aa_C36_6    | -0.571          | <0.001 |
|                  |    | PC_aa_C38_5    | -0.493          | 0.001  |
|                  |    | PC_ae_C34_3    | -0.268          | 0.047  |
|                  |    | PC_ae_C36_1    | -0.284          | 0.038  |
|                  |    | PC_ae_C36_4    | -0.499          | 0.001  |
|                  |    | PC_ae_C36_5    | -0.376          | 0.008  |
|                  |    | PC_ae_C38_0    | -0.551          | <0.001 |
|                  |    | PC_ae_C38_3    | -0.417          | 0.004  |
|                  |    | PC_ae_C40_1    | -0.530          | <0.001 |
|                  |    |                |                 |        |
|                  | SM | SM_OH_C14_1    | -0.370          | 0.009  |
|                  |    | SM_OH_C22_1    | -0.412          | 0.004  |
|                  |    | SM_OH_C22_2    | -0.291          | 0.034  |
|                  |    | SM_C16_1       | -0.321          | 0.022  |
|                  |    | SM_C18_1       | -0.269          | 0.047  |
|                  |    | SM_C24_0       | -0.341          | 0.016  |
|                  |    |                |                 |        |
|                  |    | C12_1          | 0.455           | 0.002  |
|                  |    | C14            | 0.398           | 0.006  |
|                  |    | C14_1          | 0.444           | 0.002  |
|                  |    | C14_2          | 0.513           | <0.001 |

|                    |    |                |     |                 |        |
|--------------------|----|----------------|-----|-----------------|--------|
| 30days post-LVAD   | AC | C18_1_OH       | BNP | 0.370           | 0.01   |
|                    |    | C2             |     | 0.348           | 0.015  |
|                    |    | C3_DC_C4_OH    |     | 0.391           | 0.007  |
|                    |    | C5MDC          |     | 0.395           | 0.006  |
|                    | AA |                |     | no correlations |        |
|                    | BA | Kynurenine     |     | 0.292           | 0.036  |
|                    |    | Total_DMA      |     | 0.477           | 0.001  |
|                    | PC | lysoPC_a_C18_2 |     | -0.364          | 0.01   |
|                    |    | PC_aa_C34_4    |     | -0.404          | 0.005  |
|                    |    | PC_aa_C36_5    |     | -0.337          | 0.018  |
|                    |    | PC_aa_C36_6    |     | -0.370          | 0.01   |
|                    |    | PC_ae_C36_4    |     | -0.273          | 0.047  |
|                    |    | PC_ae_C40_1    |     | -0.345          | 0.016  |
|                    | SM |                |     | no correlations |        |
| >100days post-LVAD | AC |                | CRP | no correlations |        |
|                    | AA | His            |     | -0.291          | 0.043  |
|                    | BA |                |     | no correlations |        |
|                    | PC | lysoPC_a_C18_2 |     | -0.339          | 0.022  |
|                    | SM | SM_OH_C14_1    |     | 0.287           | 0.045  |
|                    |    | SM_C16_0       |     | 0.287           | 0.045  |
| >100days post-LVAD | AC |                | BNP | no correlations |        |
|                    | AA |                |     | no correlations |        |
|                    | BA |                |     | no correlations |        |
|                    | PC | lysoPC_a_C18_2 |     | -0.562          | 0.002  |
|                    |    | PC_aa_C30_0    |     | -0.382          | 0.03   |
|                    |    | PC_aa_C32_2    |     | -0.478          | 0.008  |
|                    |    | PC_aa_C32_3    |     | -0.582          | 0.001  |
|                    |    | PC_aa_C34_2    |     | -0.521          | 0.004  |
|                    |    | PC_aa_C34_3    |     | -0.628          | <0.001 |
|                    |    | PC_aa_C34_4    |     | -0.488          | 0.007  |
|                    |    | PC_aa_C36_2    |     | -0.540          | 0.003  |
|                    |    | PC_aa_C36_3    |     | -0.474          | 0.008  |
|                    |    | PC_aa_C36_5    |     | -0.359          | 0.039  |
|                    |    | PC_aa_C36_6    |     | -0.380          | 0.03   |
|                    |    | PC_ae_C30_2    |     | -0.342          | 0.047  |
|                    |    | PC_ae_C32_2    |     | -0.387          | 0.028  |
|                    |    | PC_ae_C34_3    |     | -0.416          | 0.019  |
|                    |    | PC_ae_C36_2    |     | -0.457          | 0.011  |
|                    |    | PC_ae_C36_3    |     | -0.468          | 0.009  |
|                    |    | PC_ae_C38_0    |     | -0.348          | 0.044  |
|                    |    | PC_ae_C38_3    |     | -0.387          | 0.028  |
| >100days post-LVAD | PC | PC_ae_C40_1    | BNP | -0.442          | 0.014  |
|                    |    | PC_ae_C42_2    |     | -0.458          | 0.011  |
|                    | SM | SM_C16_1       |     | -0.380          | 0.03   |

Correlated were the metabolites with the respective CRP or BNP value. Two- tailed significance was calculated for pre-LVAD. One- tailed significance was calculated for 30days post-LVAD and >100days post-LVAD. AC= Acylcarnitine, AA=Aminoacids, BA= Biogenic amines, PC= Phosphatidylcholines, SM=Sphingomyelins.
